# Supplementary material for: Spin disorder control of topological spin texture
Source: PubMed Central journal article supplement (PMC11076609; doi:10.1038/s41467-024-47715-5), 2024-05-07
Supplement: 41467_2024_47715_MOESM1_ESM.pdf [file 41467_2024_47715_MOESM1_ESM.pdf]

# Supplementary information for:

## *Spin disorder control of topological spin texture*

Hongrui Zhang *et al.*

**Supplementary Note 1** Discussion of the origin of magnetic phase separation.

**Supplementary Note 2** Discussion of domain phase separation.

**Supplementary Fig. 1** Single-crystal XRD for bulk  $\text{Fe}_3\text{GaTe}_2$ .

**Supplementary Fig. 2** Visualization of  $\text{Fe}^{\text{int}}$  intensities in atomic-resolution iDPC-STEM image of  $\text{Fe}_3\text{GaTe}_2$ .

**Supplementary Fig. 3** Magnetic properties of bulk  $\text{Fe}_3\text{GaTe}_2$ .

**Supplementary Fig. 4.** Thickness-dependent anomalous Hall curves at various temperatures of  $\text{Fe}_3\text{GaTe}_2$ .

**Supplementary Fig. 5** X-ray magnetic circular dichroism measurements of bulk  $\text{Fe}_3\text{GaTe}_2$ .

**Supplementary Fig. 6** Field-induced magnetic phase transition and exchange bias at low Temperature.

**Supplementary Fig. 7** Anomalous Hall curves at various temperatures after ZFC.

**Supplementary Fig. 8** Calculation of magnetic exchange coupling of  $\text{Fe}_3\text{GaTe}_2$  with  $\text{Fe}^{\text{int}}$ .

**Supplementary Fig. 9** Raman mapping.

**Supplementary Fig. 10** SHG mapping.

**Supplementary Fig. 11** STM image.

**Supplementary Fig. 12** Comparison of magnetic-phase separation under two identical thermal processes.

**Supplementary Fig. 13** The schematic energy landscape of the field- and temperature-induced phase transition.

**Supplementary Fig. 14** Monte Carlo simulations.

**Supplementary Fig. 15** Thickness dependence of magnetic domain.

**Supplementary Fig. 16** Micromagnetic simulation.

**Supplementary Fig. 17** Observation of disordered spins in the  $\text{Fe}_3\text{GaTe}_2$  with  $\text{Fe}^{\text{int}}$ .

**Supplementary Fig. 18** The schematic of the formation process of zero-field skyrmion lattice.

**Supplementary Fig. 19** Lorentz TEM contrast of  $\text{Fe}_3\text{GaTe}_2$  flakes at room temperature.

**Supplementary Fig. 20** Magnetic field-induced magnetic phase transition.

**Supplementary Fig. 21** Current-induced skyrmion motion at room temperature.

**Supplementary Fig. 22** DMI discussion of  $\text{Fe}_3\text{GaTe}_2$  with/without  $\text{Fe}^{\text{int}}$ .

**Supplementary Table 1.** Calculation of magnetic exchange coupling of  $\text{Fe}_3\text{GaTe}_2$  with  $\text{Fe}^{\text{int}}$ .

**Supplementary Table 2.** DMI discussion of  $\text{Fe}_3\text{GaTe}_2$  with/without  $\text{Fe}^{\text{int}}$ .

### **Supplementary Note 1 Discussion of the origin of magnetic phase separation.**

To better understand the origin of the magnetic-phase separation in  $\text{Fe}_3\text{GaTe}_2$ , we first rule out the existence of chemical and structural inhomogeneities at the same length scale. Raman, optical second harmonic generation mapping with sub-micrometer spatial resolution and scanning tunneling microscope with atomic spatial resolution validates the structural homogeneity in  $\text{Fe}_3\text{GaTe}_2$  (Supplementary Figs. 9-11). In addition, the Ferri- and Ferro-phase regions can be easily altered by performing thermal treatments (*e.g.*, heating to 400 K and cooling back to room temperature), as evidenced in the two MFM images acquired at the same position at room temperature before and after thermal cycling (Supplementary Fig. 12). Furthermore, the Ferri-phase can transition into a ferromagnetic state by changing the temperature or applying magnetic fields. (Supplementary Fig. 13) Thus, the magnetic phase coexistence is not simply due to nanoscale chemical phase separation or structural inhomogeneity. Instead, it arises from the competition of different magnetic states with ground state energies that are relatively close to each other, assisted by thermal fluctuations.

## **Supplementary Note 2 Discussion of domain phase separation.**

In a system with perpendicular magnetizations, the long-range magnetic dipole-dipole interaction favors antiparallely aligned magnetizations of neighbor magnetic domains. In labyrinthine domains, which can be regarded as curling stripes, there are more “neighbors” of antiparallely aligned perpendicular magnetizations between the neighbor stripes. Therefore, the magnetic dipole-dipole interaction energy of labyrinthine domains is lower than that of straight parallel stripe domains. On the other hand, labyrinthine domains have longer and curling domain walls than straight parallel stripe domains, which results in higher domain wall energy. In the Ferri-phase regions, antiferromagnetic interlayer coupling results in smaller net magnetization of stripe domains, which attenuates the dipole-dipole interaction. Therefore, the domain wall energy dominates, and it favors the formation of long, straight, parallel stripe domains. Defects can also induce random short-range magnetic interactions, leading to stripe dislocations and labyrinthine domains as the temperature decreases from  $T_c$ , which explains the experimental observation in the Ferro-phase regions.

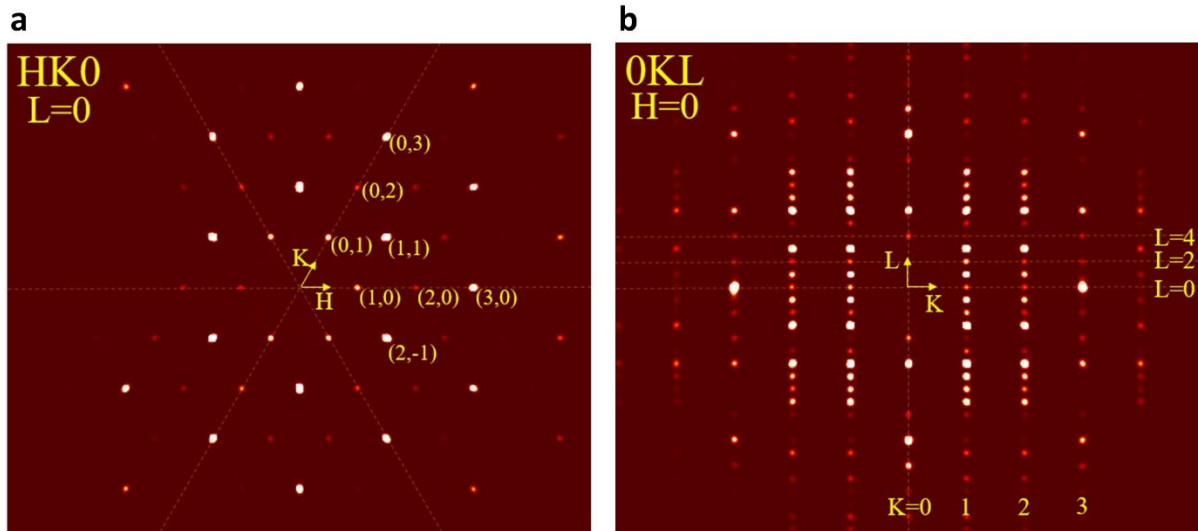

**Supplementary Fig. 1 Single-crystal XRD for bulk  $\text{Fe}_3\text{GaTe}_2$ .** We performed the single-crystal XRD measurement on the  $\text{Fe}_3\text{GaTe}_2$  with 8.5%  $\text{Fe}^{\text{int}}$ . The EDS measurement obtains the element ratio of the iron, gallium, and tellurium elements as 3.09: 0.96: 2. Single-crystal XRD patterns of the HK0 and 0KL planes are shown in **a**, **b**. The sharp diffraction spots and the missing streak signals indicate the high quality of the crystal. After the refinement of the data, the obtained lattice constants are  $a = b = 4.080 \text{ \AA}$ , and  $c = 16.138 \text{ \AA}$ . The site occupancy of the  $\text{Fe}^{\text{int}}$  is  $\sim 8.5\%$ , coincidentally equal to the excess of the stoichiometry.

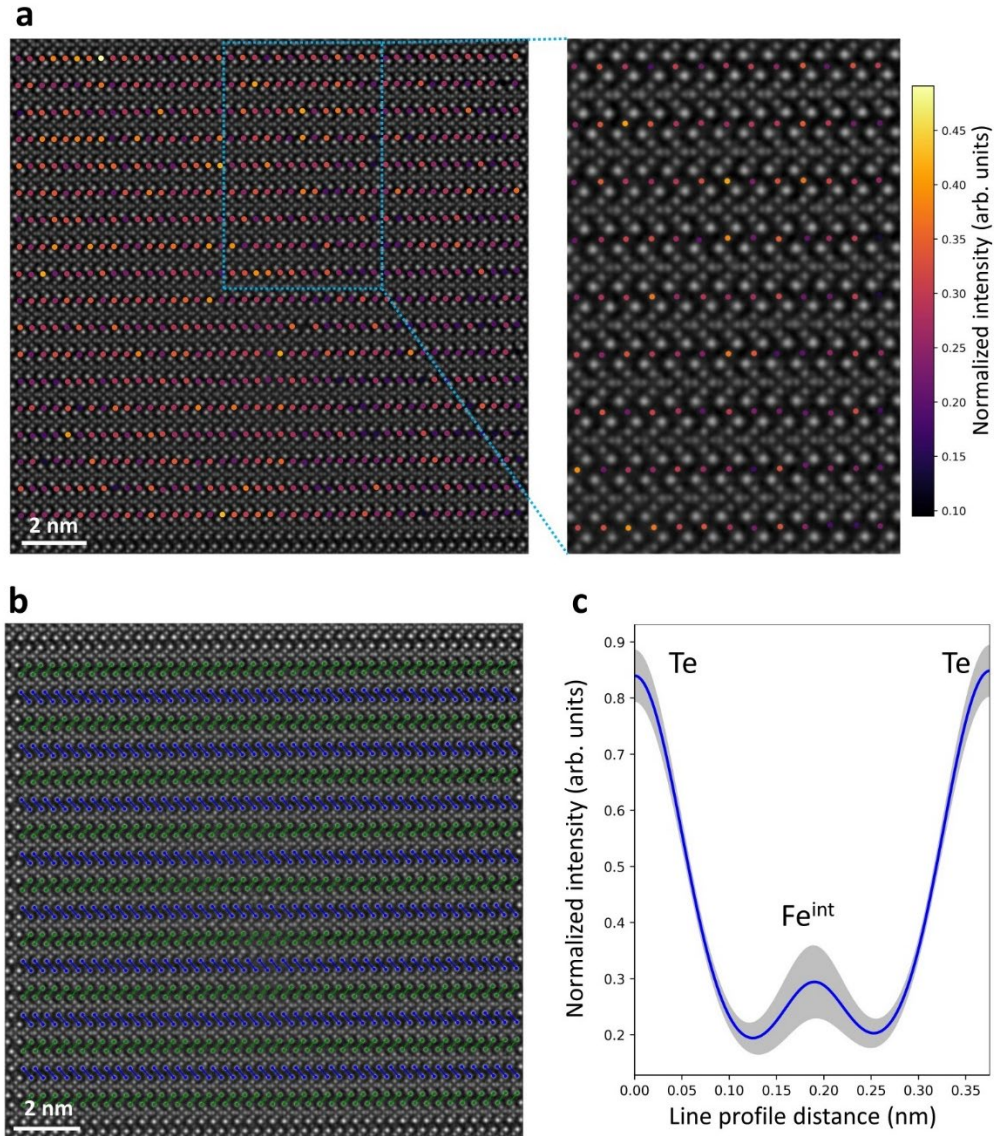

**Supplementary Fig. 2 Visualization of  $\text{Fe}^{\text{int}}$  intensities in atomic-resolution iDPC-STEM image of  $\text{Fe}_3\text{GaTe}_2$ .** **a**, Using 2D Gaussian peak fitting of the atomic-resolution cross-section iDPC-STEM image of  $\text{Fe}_3\text{GaTe}_2$  with 8.5%  $\text{Fe}^{\text{int}}$ , the intensities of  $\text{Fe}^{\text{int}}$  can be obtained and directly visualized, confirming the nanometer-scale inhomogeneous distribution of the intercalated Fe atoms. **b**, Atomic-resolution cross-section iDPC-STEM image of  $\text{Fe}_3\text{GaTe}_2$  with 8.5%  $\text{Fe}^{\text{int}}$ , in which the Te- $\text{Fe}^{\text{int}}$ -Te atomic planes were indicated as blue and green peaks. **c**, The line profiles can be obtained from the identified Te- $\text{Fe}^{\text{int}}$ -Te peaks, in which the blue and gray curves indicate the average and standard deviations over 336-line profiles, respectively. The low and large variation of intensity further confirms that the  $\text{Fe}^{\text{int}}$  atoms partially and randomly occupy the octahedral intercalated sites.

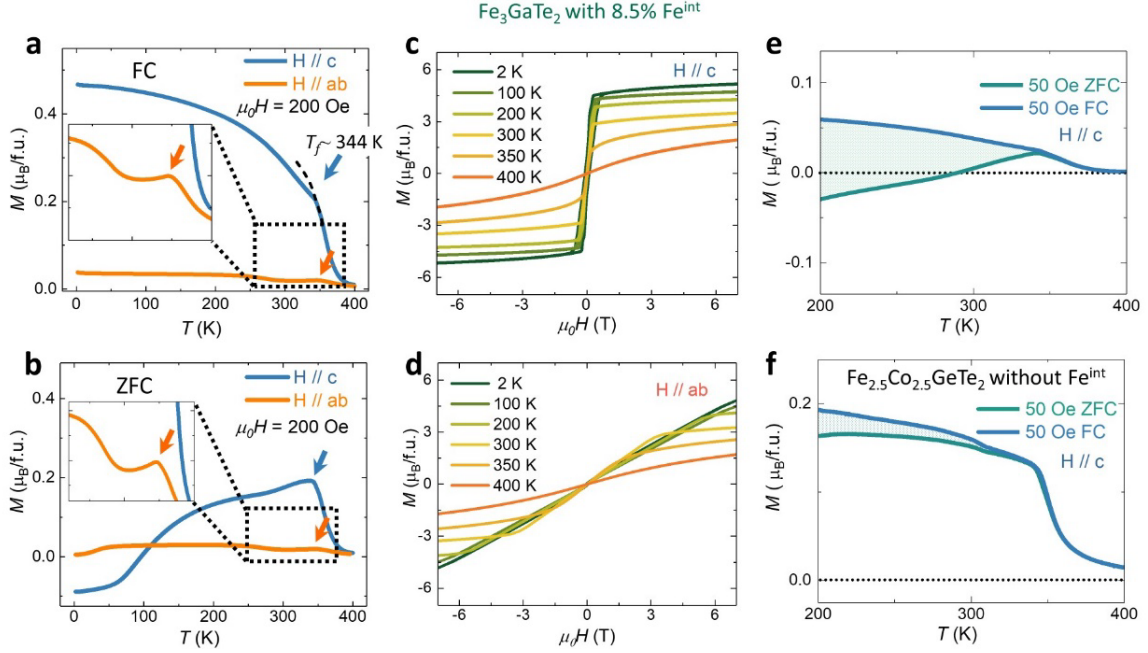

**Supplementary Fig. 3 Magnetic properties of bulk  $\text{Fe}_3\text{GaTe}_2$ .** The temperature-dependent magnetization ( $M$ - $T$ ) was measured under both the out-of-plane (blue) and in-plane (orange) magnetic fields of 200 Oe after field cooling (FC) (a) and zero-field cooling (ZFC) (b). The magnetization below frozen temperature ( $T_f$ ) decreases in all  $M$ - $T$  curves, indicating the emergence of the antiferromagnetic phase instead of a spin reorientation. Isothermal magnetization curves of a bulk crystal were measured at various temperatures under both out-of-plane (c) and in-plane (d) magnetic fields. At 2 K, the magnetization is not saturated until the in-plane field is above 7 T, indicating an easy axis along the  $c$ -axis of the crystal. The in-plane saturated field is  $\sim 3.4$  T at 300 K, with a calculated magnetic anisotropy energy ( $K_u = M_s H_k / 2$ , where  $M_s$  is the saturation magnetization,  $H_k$  the anisotropy field) of  $\sim 4.0 \times 10^5$  J/m<sup>3</sup>. We compared magnetic properties between  $\text{Fe}_3\text{GaTe}_2$  with  $\text{Fe}^{\text{int}}$  and  $\text{Fe}_{2.5}\text{Co}_{2.5}\text{GeTe}_2$  without  $\text{Fe}^{\text{int}}$  in Fig. e,f. The bifurcation between ZFC and FC MT curves is more pronounced in  $\text{Fe}_3\text{GaTe}_2$  with 8.5%  $\text{Fe}^{\text{int}}$  compared to  $\text{Fe}_{2.5}\text{Co}_{2.5}\text{GeTe}_2$ . This suggests that the  $\text{Fe}^{\text{int}}$  induces more random spins in the  $\text{Fe}_3\text{GaTe}_2$  with  $\text{Fe}^{\text{int}}$ .

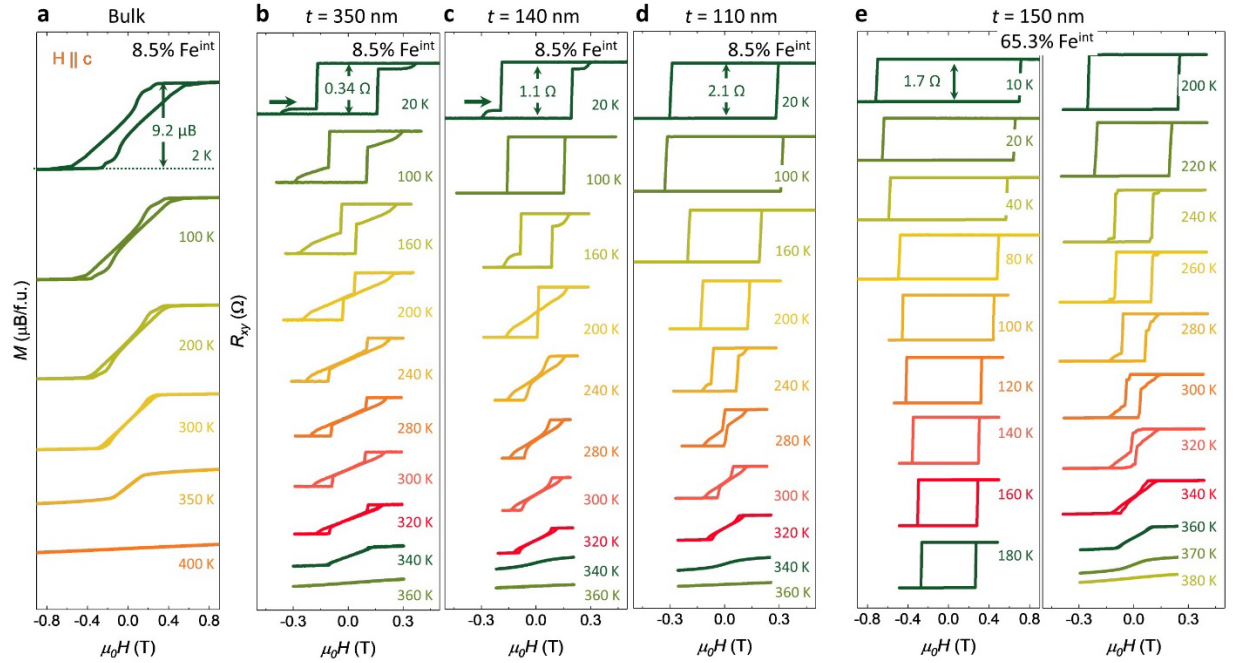

**Supplementary Fig. 4. Thickness-dependent anomalous Hall curves at various temperatures of  $\text{Fe}_3\text{GaTe}_2$ .** **a**, Isothermal magnetization curves of a bulk crystal at various temperatures. **b-e**, Anomalous Hall curves of  $\text{Fe}_3\text{GaTe}_2$  nanoflakes with 8.5%  $\text{Fe}^{\text{int}}$  ( $t = 350$  nm, 140 nm, and 110 nm) and  $\text{Fe}_3\text{GaTe}_2$  nanoflakes with 65.3%  $\text{Fe}^{\text{int}}$  ( $t = 150$  nm) obtained at different temperatures. A kink was observed at high magnetic fields in the anomalous Hall curves at low temperatures in Figs. **b** and **c**, marked by the arrows, attributed to the spin-flop transition of the interlayer antiferromagnetic phase. Since the antiferromagnetic domain size decreases as the scale along the  $c$ -direction decreases, it is difficult to stabilize a long-range antiferromagnetic order in thin nanoflakes, even at low temperatures. Thus, for  $t = 110$  nm, the anomalous Hall curves display standard square shapes without a spin-flop transition at low temperatures in Fig. **d**. No visible spin-flop transition occurs at low temperatures in  $\text{Fe}_3\text{GaTe}_2$  nanoflakes with 65.3%  $\text{Fe}^{\text{int}}$  (Fig. **e**), attributed to the relatively high energy barrier between the antiferromagnetic and ferromagnetic state at high  $\text{Fe}^{\text{int}}$  concentrations. Hence, the antiferromagnetic state is readily stabilized at low temperatures in thick  $\text{Fe}_3\text{GaTe}_2$  nanoflakes with lower  $\text{Fe}^{\text{int}}$  concentrations.



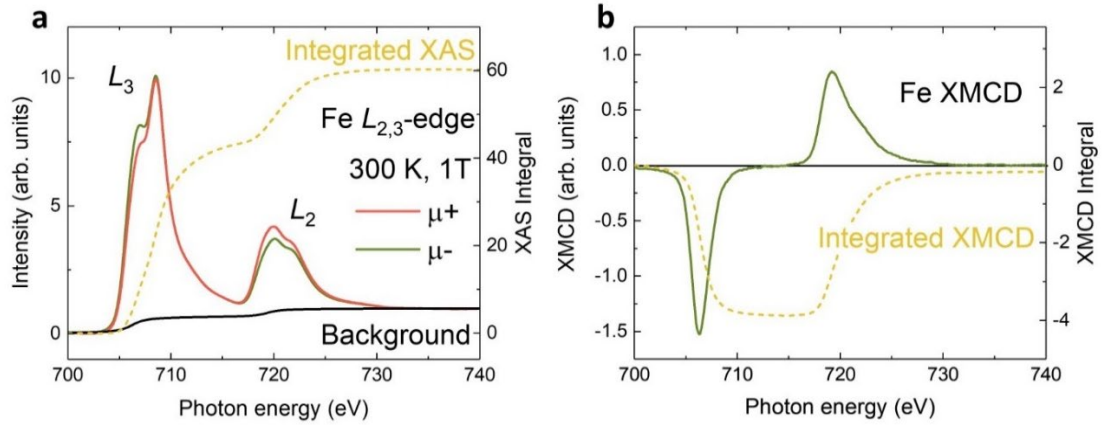

**Supplementary Fig. 5 X-ray magnetic circular dichroism measurements of bulk  $\text{Fe}_3\text{GaTe}_2$ .**

The Fe  $L_{2,3}$ -edge X-ray absorption spectra (XAS, **a**) and X-ray magnetic circular dichroism (XMCD, **b**) were measured at 300 K under 1 T, confirming the ferromagnetic ground state of  $\text{Fe}_3\text{GaTe}_2$  above room temperature. Before the measurement, we cleaved the crystal to remove the surface oxidized layer and eliminate its potential impact on the results. Using the sum rules<sup>[1]</sup>, the spin ( $m_{spin}$ ) and orbital ( $m_{orb}$ ) moment were evaluated, which yielded  $m_{spin} = 0.924 \mu\text{B}/\text{Fe}$  and  $m_{orb} = 0.020 \mu\text{B}/\text{Fe}$ , respectively. The estimated total moment is  $0.944 \mu\text{B}/\text{Fe}$ , which is close to the value from the macroscopic magnetometry. The spin and orbital moments are parallel because the Fe atoms in  $\text{Fe}_3\text{GaTe}_2$  have more than half-filled electron shells.



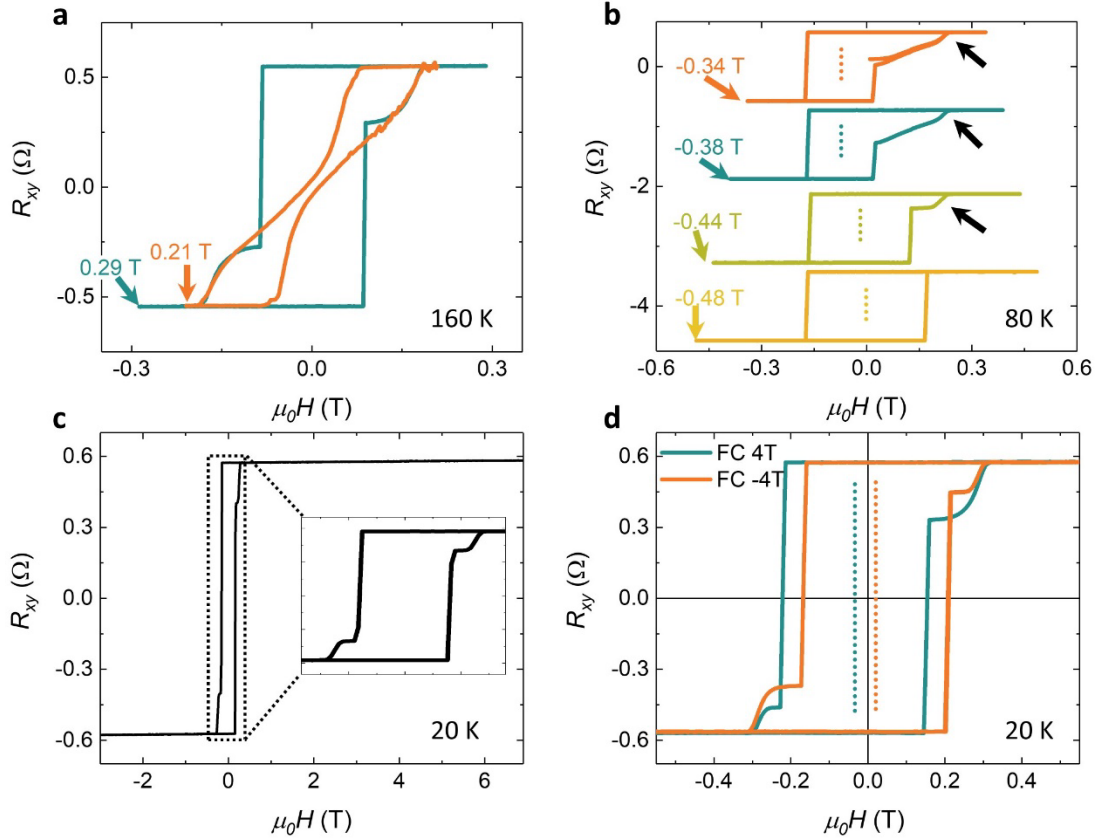

**Supplementary Fig. 6 Field-induced magnetic phase transition and exchange bias at low Temperature.** **a**, The anomalous Hall curves for the 140 nm thick  $\text{Fe}_3\text{GaTe}_2$  nanoflake with 8.5%  $\text{Fe}^{\text{int}}$  were measured at 160 K under the two different scanning ranges of the magnetic field. Note that all of the applying magnetic fields were larger than the saturation magnetic field ( $\sim 0.19$  T). When the field was swept back and forth between  $-0.21$  T and  $0.21$  T, the anomalous Hall curve showed a sheared out-of-plane hysteresis loop, indicating a multidomain state. We increased the scanning field up to  $\pm 0.29$  T; interestingly, the curve displays distinct hysteresis loops consisting of two loops with different shapes. Similar behaviors were also observed at 80 K in Fig. **b**. As the range of the scanning loops increases, the loops finally transition from a multidomain state into a standard square-shaped hysteresis loop. This indicates that even when the applied magnetic field slightly exceeds the saturation field, there are still frozen antiferromagnetically coupled spins in the system that act as nucleation centers, leading to the domain remaining in a multidomain state. As the applied field further increases, the random spins will gradually rotate along the external field, leading to a single-domain state. These further confirmed that the energies of the antiferromagnetic and ferromagnetic states are close, and the magnetic field can align the frozen

antiferromagnetic spins. **c**, The two-step loop is still there at 20 K, even if the applying field reaches up to 7 T, indicating that the magnetic field hardly aligns the frozen antiferromagnetic spins at low temperatures. **d**, The exchange bias behavior occurs at 20 K after positive and negative magnetic field cooling, further confirming the existence of the antiferromagnetic phase.

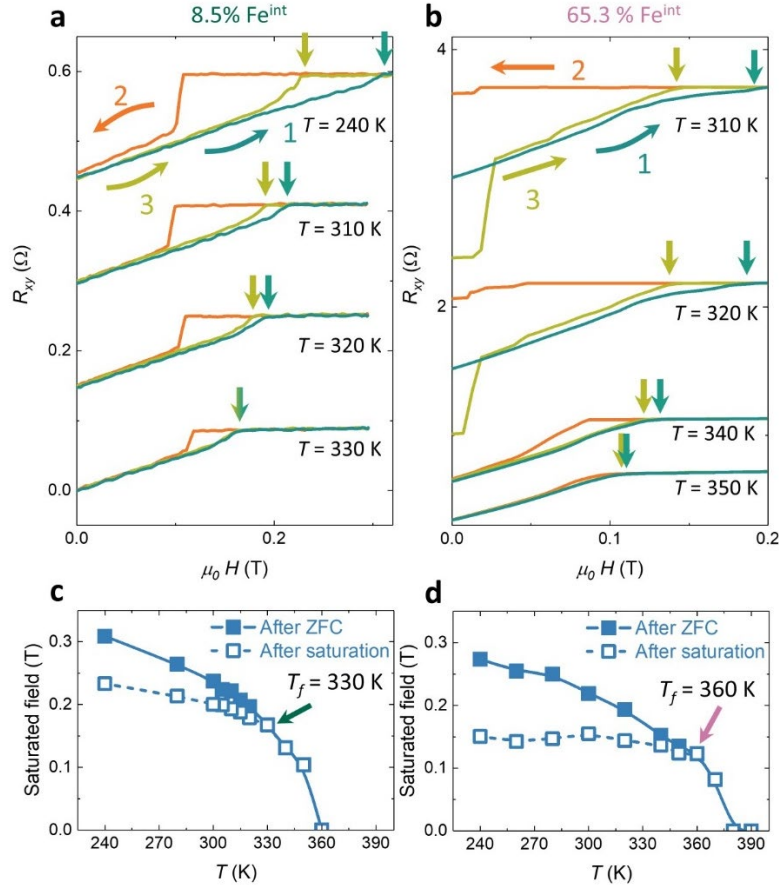

**Supplementary Fig. 7 Anomalous Hall curves at various temperatures after ZFC. a, b** Anomalous Hall curves were measured at different temperatures after ZFC. The sweep field process followed the sequence ‘1’ ~ ‘2’ ~ ‘3’. When the temperature is below  $T_f$ , the initial magnetization curves (‘1’) are located outside of the primary hysteresis loops (‘3’). Once  $T > T_f$ , the initial magnetization curves (‘1’) overlap with the primary hysteresis loops (‘3’). Finally, we summarized the temperature dependence of the saturated field after both ZFC and magnetization saturation in Figs. **c, d**, indicating that the  $T_f$  is  $\sim 330 \text{ K}$  and  $\sim 360 \text{ K}$  in  $\text{Fe}_3\text{GaTe}_2$  with  $8.5\% \text{ Fe}^{\text{int}}$  and  $65.3\% \text{ Fe}^{\text{int}}$ , respectively.

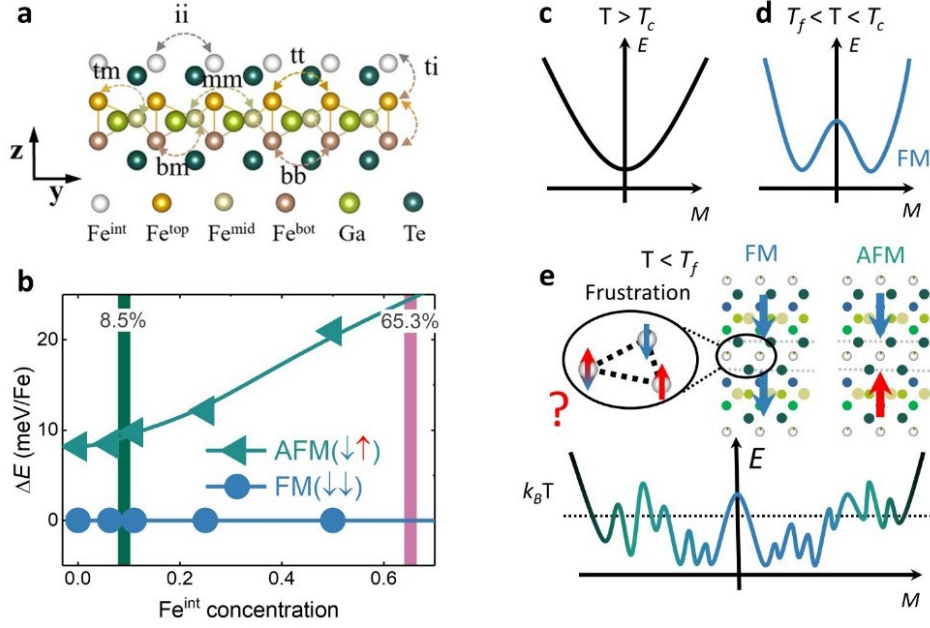

**Supplementary Fig. 8 Calculation of magnetic exchange coupling of  $\text{Fe}_3\text{GaTe}_2$  with  $\text{Fe}^{\text{int}}$ .** **a**, Side view of a monolayer  $\text{Fe}_3\text{GaTe}_2$  with intercalated iron atoms. The intercalated, top, middle, and bottom Fe ions are denoted as  $\text{Fe}^{\text{int}}$ ,  $\text{Fe}^{\text{top}}$ ,  $\text{Fe}^{\text{mid}}$ , and  $\text{Fe}^{\text{bot}}$ , respectively. Note that  $\text{Fe}^{\text{top}}$  and  $\text{Fe}^{\text{bot}}$  are symmetrically equivalent in  $\text{Fe}_3\text{GaTe}_2$  but not in  $\text{Fe}_3\text{GaTe}_2$  with  $\text{Fe}^{\text{int}}$ . The considered exchange paths are shown by the double arrows. For the  $\text{Fe}_3\text{GaTe}_2$ , the first-nearest neighbor ( $\text{Fe}^{\text{top}}\text{-Fe}^{\text{bot}}$ ), the second-nearest neighbor ( $\text{Fe}^{\text{top}}\text{-Fe}^{\text{mid}}$ , or equivalently  $\text{Fe}^{\text{bot}}\text{-Fe}^{\text{mid}}$ ), and the third-nearest neighbor ( $\text{Fe}^{\text{top}}\text{-Fe}^{\text{top}}$ , or equivalently  $\text{Fe}^{\text{bot}}\text{-Fe}^{\text{bot}}$ ) all yield strong ferromagnetism (Table 1). The third-nearest neighbor ( $\text{Fe}^{\text{mid}}\text{-Fe}^{\text{mid}}$ ) favors weak antiferromagnetism with  $J^{\text{mm}} = 4.3$  meV. In contrast, by introducing the intercalated atoms  $\text{Fe}^{\text{int}}$ , the exchange coupling between the  $\text{Fe}_3\text{GaTe}_2$  and intercalated atom ( $\text{Fe}^{\text{top}}\text{-Fe}^{\text{int}}$ ) is strongly ferromagnetic with  $J^{\text{ti}} = -187.1$  meV. The ferromagnetic  $J^{\text{tb}}$  rapidly decreases compared with that of the freestanding  $\text{Fe}_3\text{GaTe}_2$ . This can be understood as the enhancement of exchange coupling between  $\text{Fe}^{\text{int}}$  and  $\text{Fe}^{\text{top}}$ , resulting in the reduction of adjacent interactions of  $\text{Fe}_3\text{GaTe}_2$  itself. Note that the  $J^{\text{tm}}$  and  $J^{\text{bm}}$ , as well as the  $J^{\text{tt}}$  and  $J^{\text{bb}}$ , are non-equivalent in  $\text{Fe}_3\text{GaTe}_2$  with  $\text{Fe}^{\text{int}}$  since both the overlap integral and local symmetry are strongly altered by the intercalation effect. Especially, the antiferromagnetic  $J^{\text{mm}}$  increases obviously, compared with that of  $\text{Fe}_3\text{GaTe}_2$ . Besides, the introduced intercalated iron atoms ( $\text{Fe}^{\text{int}}\text{-Fe}^{\text{int}}$ ) favor strong antiferromagnetism with  $J^{\text{ii}} = 17.3$  meV. Such interactions yield geometric frustration (antiferromagnetism in triangular sublattice) and compete with the aforementioned ferromagnetic ones, which weakens ferromagnetism and helps stabilize non-

collinear states. Thus, the low  $\text{Fe}^{\text{int}}$  concentration favors a spin glass state; with the increase in  $\text{Fe}^{\text{int}}$  concentration, a spin-frustrated state can be stabilized. **b**, The relative ground state energy of the antiferromagnetic state with respect to the fully ferromagnetic state versus the  $\text{Fe}^{\text{int}}$  concentration in  $\text{Fe}_{3+x}\text{GaTe}_2$ . The magnetic ground state of  $\text{Fe}_{3+x}\text{GaTe}_2$  is always an interlayer ferromagnetic coupling. The barrier energy between ferromagnetic and antiferromagnetic are close in  $\text{Fe}_3\text{GaTe}_2$  without  $\text{Fe}^{\text{int}}$  and increase as the  $\text{Fe}^{\text{int}}$  concentration. Thus, the magnetic state of  $\text{Fe}_{3+x}\text{GaTe}_2$  after ZFC can be depicted as the schematic of the energy landscape in Fig. **c-e**. At  $T < T_f$ , e.g., at room temperature, the magnetic state of the system manifests the existence of antiferromagnetic couplings within a ferromagnetic background (Fig. **e**).

**Supplementary Table 1.** Magnetic parameters (in meV) of  $\text{Fe}_3\text{GaTe}_2$  (FGT) and  $\text{Fe}_3\text{GaTe}_2$  with full intercalated  $\text{Fe}^{\text{int}}$  (FGTF) MLs under different exchange paths marked in **Supplementary Fig. 8**. The negative and positive values represent the ferromagnetic and antiferromagnetic exchange interactions, respectively.

| Exchange paths | tb    | tm    | bm    | mm   | tt    | bb   | ii   | ti     |
|----------------|-------|-------|-------|------|-------|------|------|--------|
| <b>FGT</b>     | -81.4 | -61.8 | -61.8 | 4.3  | -8.6  | -8.6 |      |        |
| <b>FGTF</b>    | -11.1 | -51.2 | -31.8 | 7.93 | -10.4 | -9.5 | 17.3 | -187.7 |

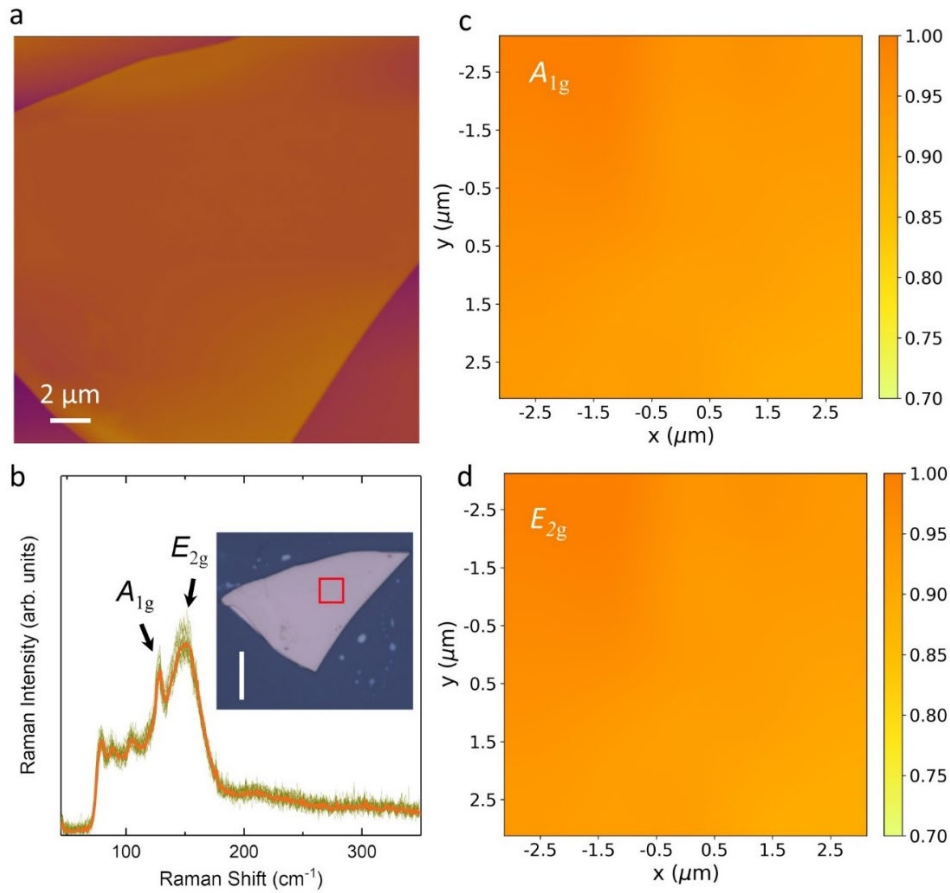

**Supplementary Fig. 9 Raman mapping.** The Raman measurements were conducted using a Horiba Jobin Yvon LabRAM ARAMIS confocal Raman microscope under 532nm excitation. The laser was focused to a spot around  $1 \mu\text{m}^2$  through an Olympus 100x objective lens. The polarizer and analyzer were set to a parallel configuration.  $\text{Fe}_3\text{GaTe}_2$  samples were mounted on an automated XY piezo stage to achieve spatial mapping. **a**, The atomic force microscopy image of the  $\text{Fe}_3\text{GaTe}_2$  with 8.5%  $\text{Fe}^{\text{int}}$  nanoflake for Raman spectrum measurement. The nanoflake thickness is  $\sim 136 \text{ nm}$ , obtained by the line profile of the atomic force microscopy image. **b**, Inset: the optical image of the flake. The scale bar is  $10 \mu\text{m}$ . Raman spectra of the  $\text{Fe}_3\text{GaTe}_2$  nanoflakes were acquired with a scanning region of  $5 \times 5 \mu\text{m}^2$ , as indicated by the red box in the inset figure. The laser spots utilized for Raman measurements are smaller than  $1 \mu\text{m}$  in diameter. The Raman peak profiles of  $\text{Fe}_3\text{GaTe}_2$  8.5%  $\text{Fe}^{\text{int}}$  in Fig. **b** are identified at  $128.9 \text{ cm}^{-1}$  and  $150.4 \text{ cm}^{-1}$ , which can be attributed to the  $A_{1g}$  and  $E_{2g}$  phonon modes, respectively. No measurable shift in the peak position of the Raman profiles is detected within the whole region. Raman spectrum mapping using both the  $A_{1g}$  (**c**) and  $E_{2g}$  (**d**) mode on the  $\text{Fe}_3\text{GaTe}_2$  nanoflake indicates that  $\text{Fe}^{\text{int}}$  atoms have an inhomogeneous distribution.

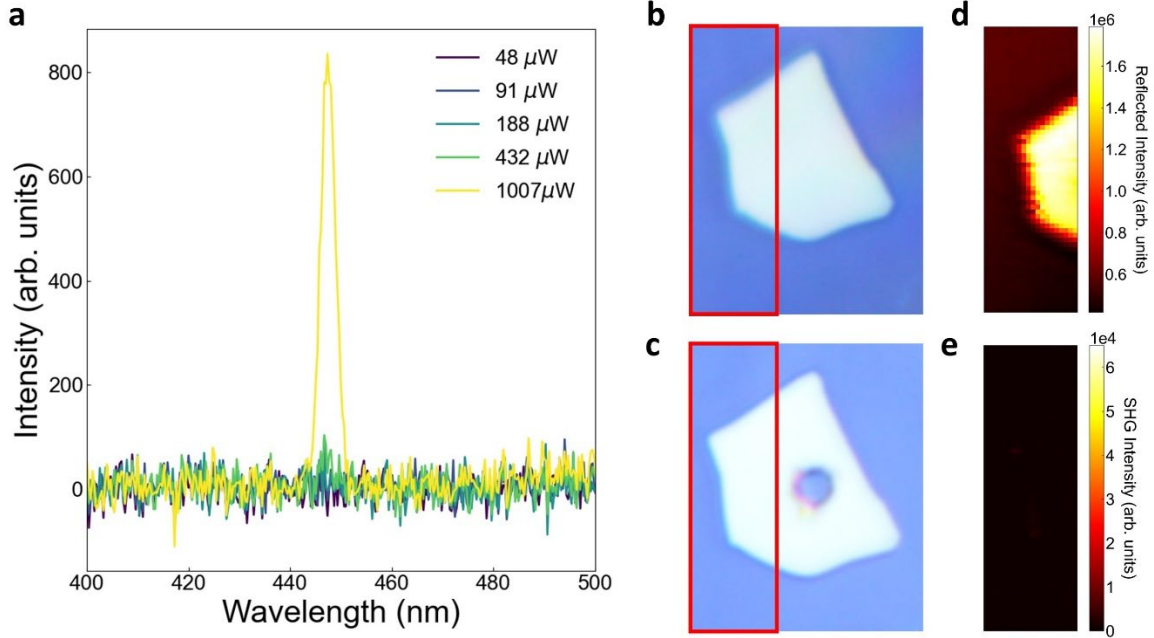

**Supplementary Fig. 10 SHG mapping.** SHG and Reflection measurements were performed using a Ti: Sapphire oscillator (Chameleon Ultra, Coherent) with  $\sim 100$  fs pulse widths and a center wavelength of 900 nm. This was done in a normal-incidence reflection geometry. The light was focused using a 100x (NA=0.95) objective. For reflection measurements, the laser was sent to the objective, and the signal was reflected back through a 50:50 beam-splitter, whereas for SHG a 720 nm short pass dichroic beam-splitter was used with additional filtering of the backscattered signal using a 580 nm short pass filter. The signal was collected using a spectrometer (Spectra Pro 500i, Acton Research Instruments) with a charge-coupled camera (Andor iXon CCD). **a**, Power-dependent second harmonic generation (SHG) spectrum was measured for an as-grown  $\text{Fe}_3\text{GaTe}_2$  with 8.5%  $\text{Fe}^{\text{int}}$  nanoflake at room temperature. At low laser energy, no measurable SHG signal was observed. Once the sample was damaged by the high-energy laser heating, the SHG signal was observed. The optical images of the nanoflake before and after damage are exhibited in **b** and **c**, respectively. The laser reflection image of the nanoflake (**d**) in the red box in Fig. **b** corresponds to the SHG mapping (**e**). No signal is observed in SHG mapping, which indicates that there is no in-plane breaking of inversion symmetry in this system. This also implies no long-range ordering of the  $\text{Fe}^{\text{int}}$  within the vdW gap.



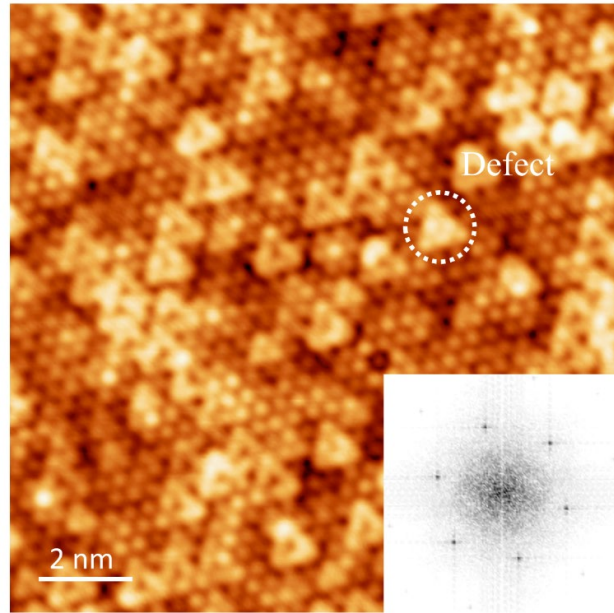

**Supplementary Fig. 11 STM image.** Single crystals of  $\text{Fe}_3\text{GaTe}_2$  were cleaved under ultra-high vacuum (UHV) at room temperature. After cleaving, the samples were immediately transferred onto the STM head for measurement. All scanning tunneling microscopy (STM) data were acquired in a commercial Omicron low temperature-STM held at  $T = 4.7$  K using a tungsten tip. The tip was prepared on a Cu (111) surface and calibrated against the Cu (111) surface state. All STM images were processed using WSxM software<sup>[2]</sup>. Scanning tunneling microscope (STM) topographic images of the  $\text{Fe}_3\text{GaTe}_2$  with 8.5%  $\text{Fe}^{\text{int}}$  surface reveal hexagonal lattices attributed to the uppermost tellurium atoms ( $V_{\text{bias}} = -10$  mV,  $I_t = 1$  nA). The obtained in-plane lattice constant is  $4.09 \pm 0.07$  Å, which is consistent with the single-crystal XRD results. Surface defects of triangular atomic clusters are observed (e.g. white circle above), which are attributed to the presence of  $\text{Fe}^{\text{int}}$  atoms remaining at the cleaved surface. The coverage of the triangular surface defects averaged from 12 areas randomly selected on the sample surface is  $10.8\% \pm 7.7\%$ , which is consistent with the results of the single-crystal XRD refinement. Unlike the single-crystal XRD and STEM results, where the  $\text{Fe}^{\text{int}}$  atoms are located at the center of the trigonal tellurium lattice, the surface iron atoms in the STM images tend to align with the tellurium lattice. This could be explained by the reconstruction of surface iron atoms due to the different chemical environments between surface and bulk.

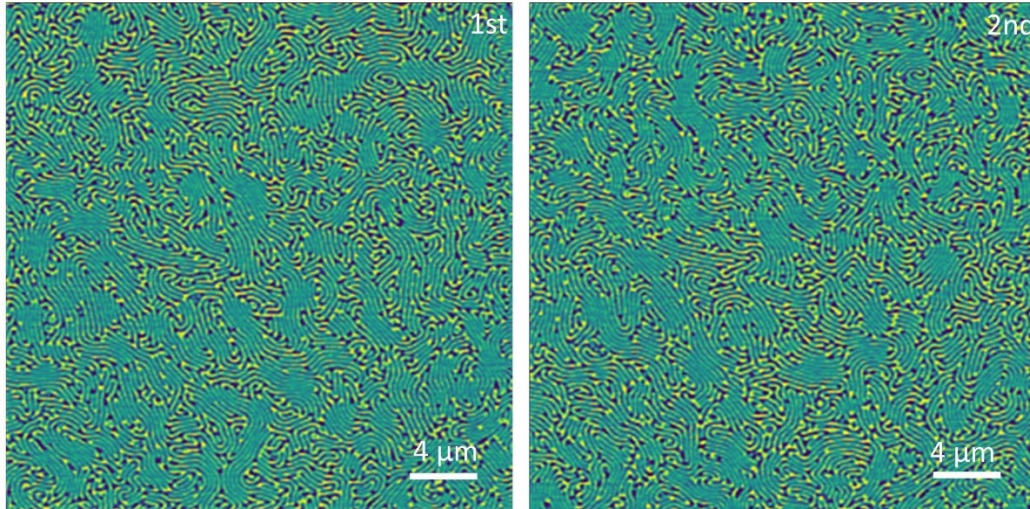

**Supplementary Fig. 12 Comparison of magnetic-phase separation under two identical thermal processes.** MFM images were captured for the 211-nm-thick  $\text{Fe}_3\text{GaTe}_2$  nanoflake with 8.5%  $\text{Fe}^{\text{int}}$  at room temperature and zero field after undergoing twice zero-field cooling processes. The regions of magnetic-phase separation for the two images are different, indicating that the two-phase separation does not arise from a chemical or structural phase separation.

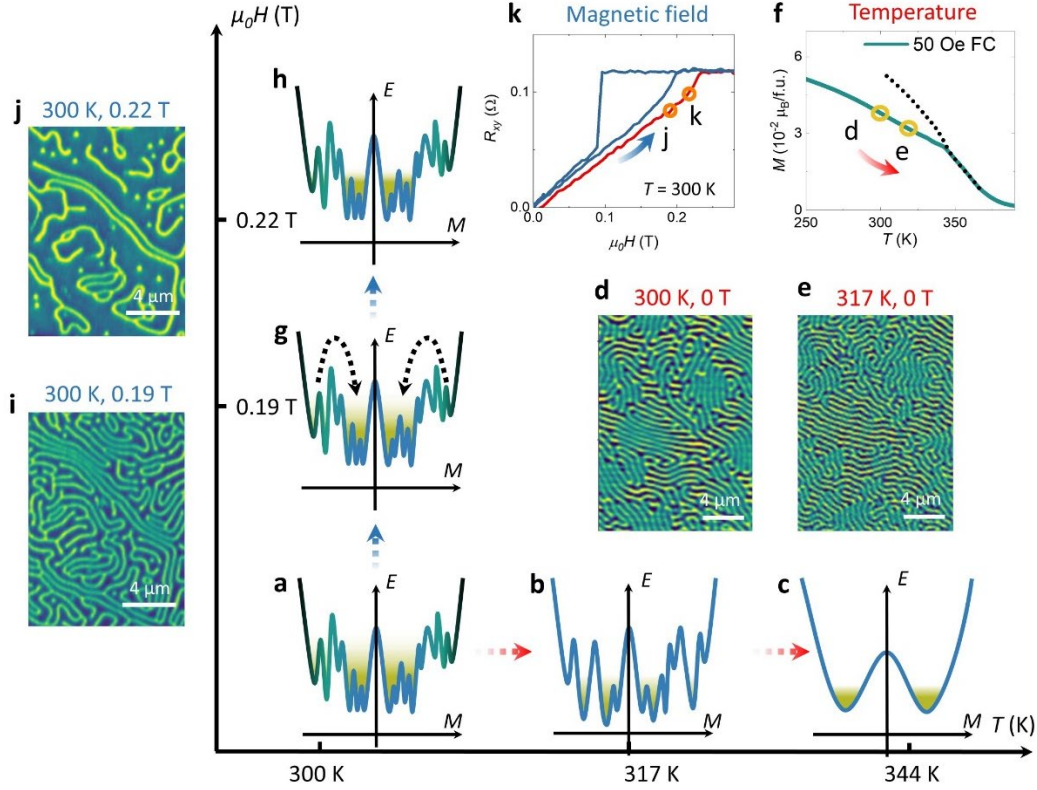

**Supplementary Fig. 13 The schematic energy landscape of the field- and temperature-induced phase transition.** **a**, The schematic energy landscape of the  $\text{Fe}_3\text{GaTe}_2$  with 8.5%  $\text{Fe}^{\text{int}}$  after ZFC. Thermal fluctuation near  $T_c$  can overcome the energy barrier between the antiferromagnetic and ferromagnetic states, thus forming a coexistence of antiferromagnetic and ferromagnetic states after cooling down near  $T_c$ . When heating the sample (**b**, **c**) or applying a magnetic field (**g**, **h**), the antiferromagnetic state transitions into the ferromagnetic state, as follows the energy landscape. The MFM images of Figs. **d**, **e** are measured at yellow circles indicated in the M-T curve (Fig. **f**). The MFM images of Figs. **j**, **i** are measured at orange circles indicated in the anomalous Hall curve (Fig. **k**). Correspondingly, the contrast of MFM images becomes uniform, as shown in Figs. **e**, **i**.

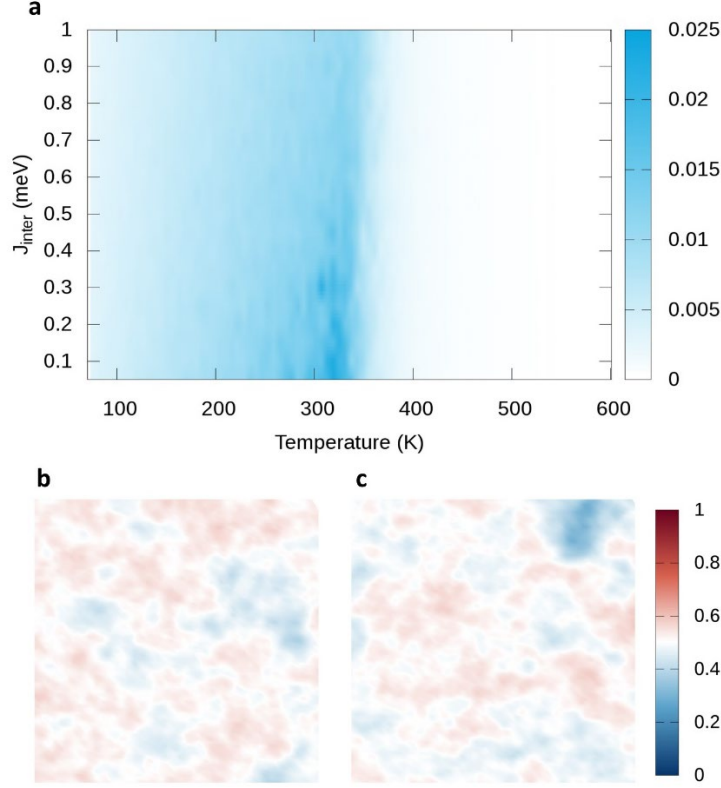

**Supplementary Fig. 14 Monte Carlo simulations.** **a**, Simulated phase diagram of magnetic-phase separation as a function of Temperature and  $J_{\text{inter}}$  (magnetic coupling between adjacent interlayers). We carried out Monte Carlo (MC) simulations for  $\text{Fe}_3\text{GaTe}_2$  bulk using the calculated magnetic exchange interactions in Tables 1 and 2 and various  $J_{\text{inter}}$ . The color bar represents  $\Phi$ . Here, we define the degree of ferromagnetic/antiferromagnetic phase separation as

$$\phi = \sqrt{\phi_{\text{FM}} \phi_{\text{AFM}}}$$

, where  $\phi_{\text{FM}}$  and  $\phi_{\text{AFM}}$  are the order parameters of the ferromagnetic and antiferromagnetic phases.

$$\phi_{\text{FM}} = \frac{1}{2N} \sum_{i=1, N} |S_z^i(1) + S_z^i(2)|,$$

$$\phi_{\text{AFM}} = \frac{1}{2N} \sum_{i=1, N} |S_z^i(1) - S_z^i(2)|$$

Where 1 and 2 denote adjacent layer 1 and layer 2,  $N$  is the number of spins in each layer,  $S_z^i$  is the  $z$  component of the spin vector of the site  $i$  averaged over 10000 Monte Carlo steps. Then, for the pure phase (ferromagnetic, antiferromagnetic, and paramagnetic),  $\Phi = 0$ . The non-zero  $\Phi$  only

corresponds to ferromagnetic/antiferromagnetic phase separations. In Panel **a**, the magnetic-phase separation was reproduced below the  $T_N$ . To validate this, we further simulate the magnetic ordering at room temperature using  $J_{\text{inter}} = 1$  (**b**) and 0.5 meV(**c**). Although the  $J_{\text{inter}}$  here is relatively small, due to the low barrier between the ferromagnetic and antiferromagnetic phase, it could satisfy a suitable local  $J_{\text{inter}}$  under the interplay of thermal fluctuations and intercalating. The  $100 \times 100 \times 1$  supercells in Figs. **b** and **c**, are adopted in the MC simulation. The red color represents the ferromagnetic phase, and the blue color represents the antiferromagnetic phase. An antiferromagnetic phase can be observed in these two figures, confirming the existence of ferromagnetic/antiferromagnetic phase separation.



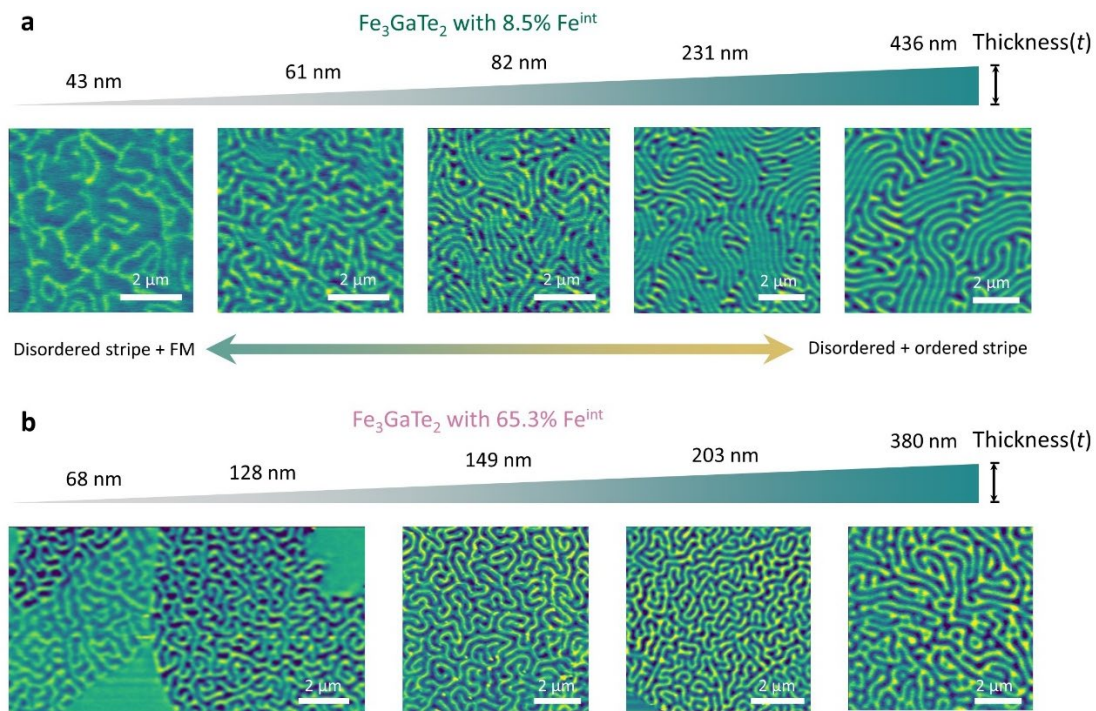

**Supplementary Fig. 15 Thickness dependence of magnetic domain.** Thickness-dependent MFM images for  $\text{Fe}_3\text{GaTe}_2$  nanoflakes with 8.5%  $\text{Fe}^{\text{int}}$  (**a**) and 65.3 %  $\text{Fe}^{\text{int}}$  (**b**) at room temperature. The magnetic domain exhibits two phases in the thick  $\text{Fe}_3\text{GaTe}_2$  nanoflakes with 8.5%  $\text{Fe}^{\text{int}}$ . In the 43 nm thick nanoflake, only dislocations or short domains were observed. All MFM images for  $\text{Fe}_3\text{GaTe}_2$  nanoflakes with 65.3 %  $\text{Fe}^{\text{int}}$  display the labyrinthine domain.

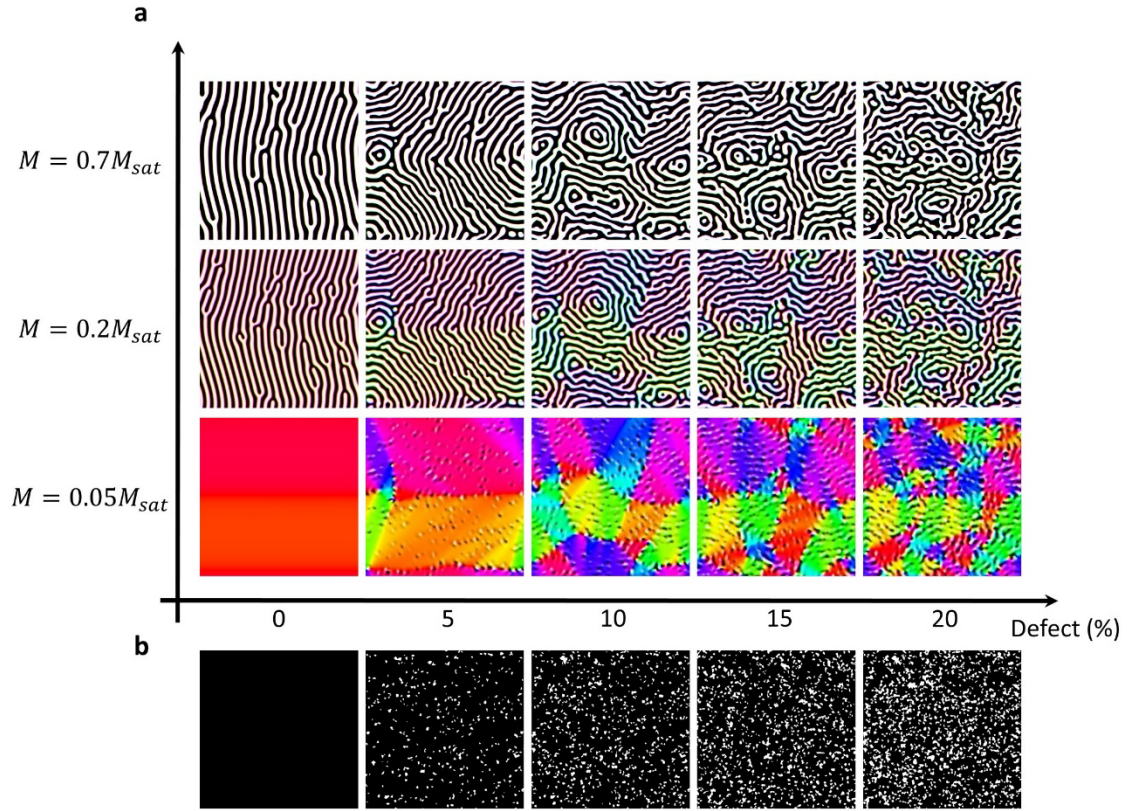

**Supplementary Fig. 16 Micromagnetic simulation.** **a**, Evolution of magnetic domains as the saturation magnetization gradually increases when the temperature decreases from around  $T_c$ . At each defect level, there is one continuous simulation with the evolution of the magnetic parameters. Every simulation starts from randomized initial magnetization. As the defect density increases, the magnetic domain pattern tends to form a complex labyrinthine domain, closely reproducing the experimental results. The image size is  $4.5 \times 4.5 \mu\text{m}^2$ . **b**, Distribution of defects represented by bright spots in each image, with three times of uniaxial magnetic anisotropy energy compared with defect-free dark regions to represent the local magnetic pinning effect from defects phenomenologically.



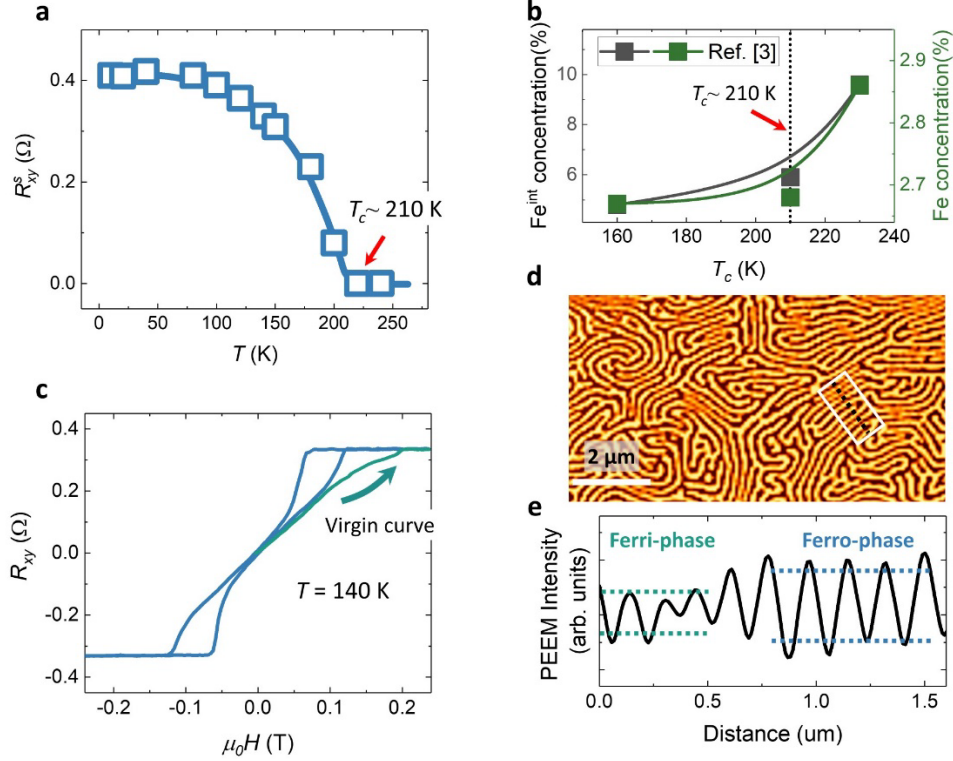

**Supplementary Fig. 17 Observation of disordered spins in the  $\text{Fe}_3\text{GeTe}_2$  with  $\text{Fe}^{\text{int}}$ .** **a**, Temperature dependence of the saturated anomalous Hall resistance ( $R_{xy}^s$ ) for  $\text{Fe}_3\text{GeTe}_2$  nanoflake with a thickness of 140 nm reveals the  $T_c$  of 210 K. In the previous report<sup>[3]</sup>, it was observed that  $\text{Fe}^{\text{int}}$  persistently exists in the vdWs gap of  $\text{Fe}_3\text{GeTe}_2$ , even when the ratio of iron atoms is lower than 3. The  $\text{Fe}/\text{Fe}^{\text{int}}$  concentration can tune the  $T_c$  of the  $\text{Fe}_3\text{GeTe}_2$  system, as illustrated in Fig. **b** <sup>[3]</sup>. According to this relationship, the  $\text{Fe}^{\text{int}}$  concentration in our case can be estimated to be  $\sim 6.7\%$ . **c**, The anomalous Hall curve was measured at 140 K after ZFC from 300 K. The virgin curve lies outside of the primary hysteresis loops, similar to the  $\text{Fe}_3\text{GaTe}_2$  with  $\text{Fe}^{\text{int}}$  system, suggesting the existence of random spins. **d**, The XMCD-PEEM image of the  $\text{Fe}_3\text{GeTe}_2$  with the  $\text{Fe}^{\text{int}}$  system was captured at 110 K after ZFC. We also can observe the two distinct contrast regions. The line profile along the dark dotted line in the white box (Fig. **d**) is displayed in Fig. **e**. The PEEM intensity of the Ferri-phase region, due to the existence of the antiferromagnetic coupled sublayers, is lower than the Ferro-phase region. The domain size of the Ferri-phase ( $\sim 77.6$  nm), due to its low stray field, is smaller than the Ferro-phase (91.0 nm).

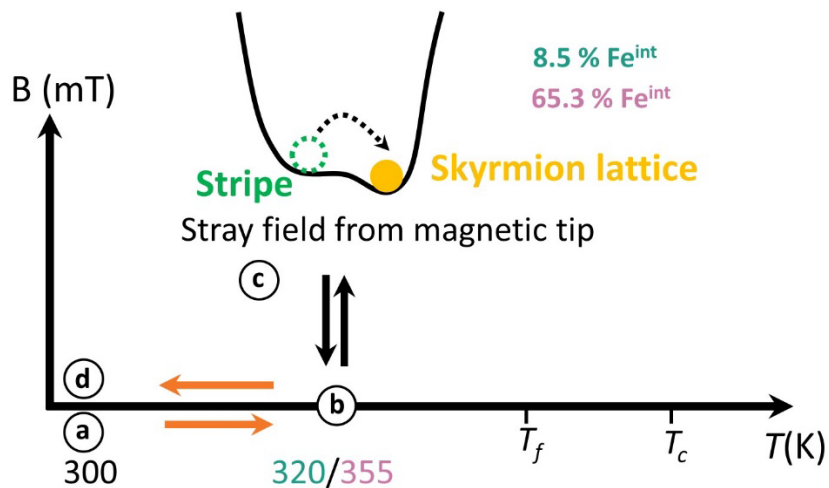

**Supplementary Fig. 18 The schematic of the formation process of zero-field skyrmion lattice.**

First, we performed zero-field cooling on the nanoflakes (a). Since the thermal fluctuation helps the stabilization of the skyrmion lattices,<sup>[4, 5]</sup> (b) we slightly heated the nanoflakes. (c) Then, the skyrmion lattices were induced after the MFM tips swept the nanoflakes. (d) The skyrmion lattices remain when the temperature cools down to room temperature.

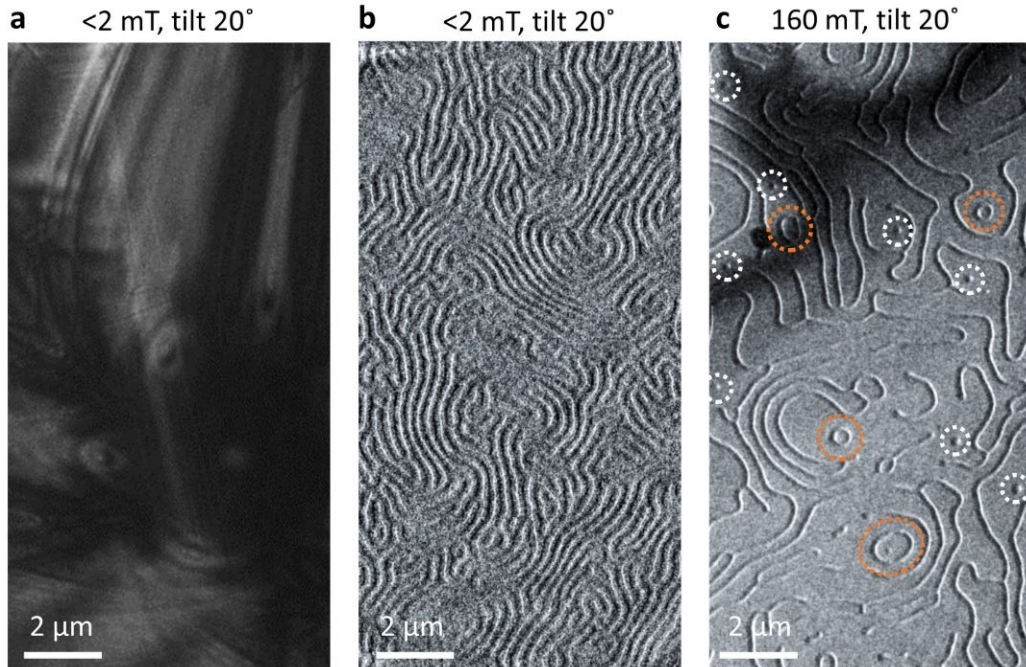

**Supplementary Fig. 19 Lorentz TEM contrast of  $\text{Fe}_3\text{GaTe}_2$  flakes at room temperature.** **a**, Lorentz TEM image of a 200 nm thick  $\text{Fe}_3\text{GaTe}_2$  nanoflake with 8.5%  $\text{Fe}^{\text{int}}$  acquired at room temperature, with a residual field of  $< 2\text{ mT}$  and a defocus of 3 mm. No magnetic contrast in both the Ferro-phase and Ferri-phase regions was observed without titling the samples. **b**, When the sample is tilted by  $20^\circ$ , the two distinct contrasts emerge in the Lorentz TEM image, which is consistent with the MFM and XMCD-PEEM images. This indicates that magnetic textures are Néel-type and have no measurable tilted spins in the Ferri-phase regions. The two images (**a**, **b**) are acquired at nearby regions of the same nanoflake. **c**, Skyrmions (white dotted circles) and skyrmioniums (orange dotted circles) were observed under a magnetic field of 160 mT.

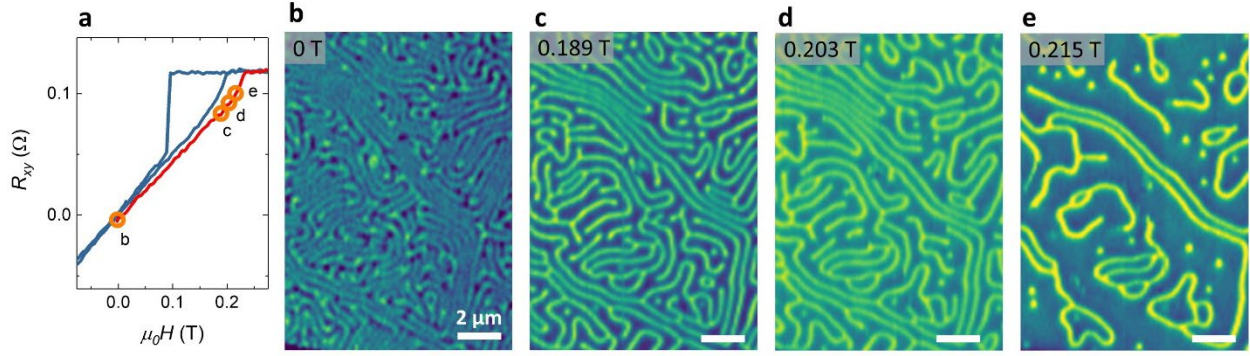

**Supplementary Fig. 20 Magnetic field-induced phase transition.** **a**, The anomalous Hall curve of the  $\text{Fe}_3\text{GaTe}_2$  nanoflake with 8.5%  $\text{Fe}^{\text{int}}$  with a thickness of 350 nm was measured at 300 K after ZFC. The two phases were clearly observed at zero field in Fig. **b**. Then, we gradually increase the magnetic field following the anomalous Hall curves in Fig. **a** (orange circle). **c**, At  $\mu_0H = 0.189$  T, the MFM contrast becomes uniform, indicating the occurrence of phase transition from antiferromagnetic to ferromagnetic state. **d**, **e**, As the magnetic field increases, in the Ferro-phase region, the short stripe domains shrink into bubbles; the ring-shaped dislocation transitions into skyrmionium. After applying a magnetic field larger than the saturation field, all random spins depinning, and the system enters a more stable ferromagnetic state. Then, subsequently removing the field,  $\text{Fe}_3\text{GaTe}_2$  exhibited a transition in their domain patterns to a labyrinthine domain structure. After this, when a finite magnetic field was applied, the formation of magnetic skyrmion and skyrmionium was not observed in the  $\text{Fe}_3\text{GaTe}_2$  nanoflake with 8.5%  $\text{Fe}^{\text{int}}$ . Therefore, the formation of topological spin texture in  $\text{Fe}_3\text{GaTe}_2$  is attributed to the existence of random spins.

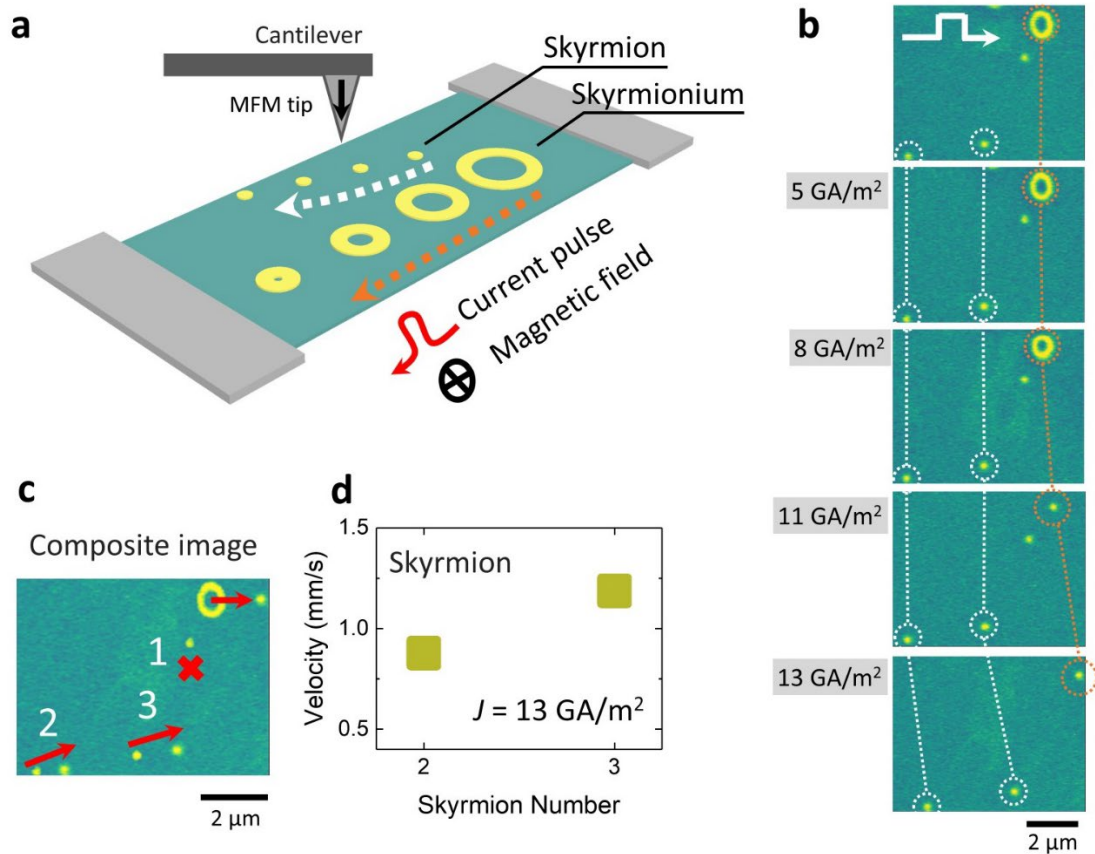

**Supplementary Fig. 21 Current-induced skyrmion motion at room temperature.** **a**, The experimental schematic image of current-induced skyrmion motion. An external magnetic field ( $\sim 0.194$  T) was applied to a 195 nm thick nanoflake to stabilize the three isolated skyrmions and one skyrmionium in Fig. **b**. Each image was acquired after injecting one current pulse with a duration of 1 ms and various current-density amplitudes. Below the current density of  $\sim 5$  GA/m<sup>2</sup>, both skyrmions and skyrmioniums are not motived by pulse current. Slightly above  $\sim 5$  GA/m<sup>2</sup>, skyrmioniums start to move and shrink and, finally, collapse into a skyrmion. At  $j = 13$  GA/m<sup>2</sup>, the skyrmions start motion or can be annihilated. This indicates that the skyrmionium is more easily moved by pulse current than the skyrmion. The skyrmion motion is not forward along the current direction in Fig. **c**, since the Magnus force moves the skyrmions perpendicular to the current direction, which is the so-called skyrmion Hall effect. The velocity of the skyrmions at room temperature is  $\sim 1.03$  mm/s, at  $j = 13$  GA/m<sup>2</sup> in Fig **d**.



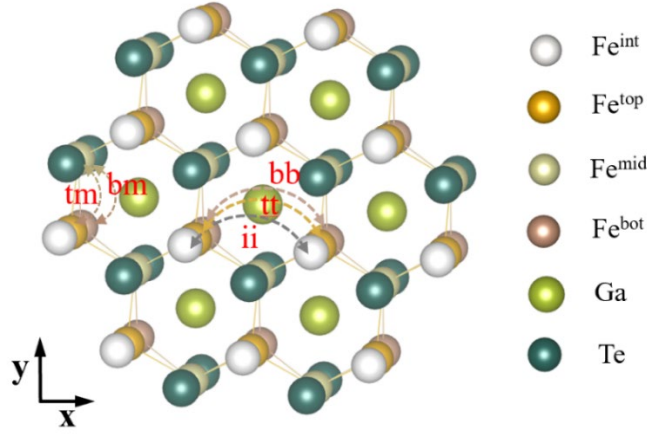

**Supplementary Fig. 22 DMI discussion of  $\text{Fe}_3\text{GaTe}_2$  with/without  $\text{Fe}^{\text{int}}$ .** Top view of monolayer  $\text{Fe}_3\text{GaTe}_2$  with intercalated iron atoms. The DMIs under marked **ii**, **tt**, and **bb** paths are along the y (-y) direction, while they point to the x (-x) direction under the **tm** and **bm** paths. The adopted exchange paths are shown by the double arrows. Here, we take the  $\text{Fe}_3\text{GaTe}_2$  with fully intercalated  $\text{Fe}^{\text{int}}$  as an example to explore the DMI in this system. Obviously, both the first-nearest neighbor,  $\text{Fe}^{\text{top}}\text{-Fe}^{\text{int}}$ ,  $\text{Fe}^{\text{bot}}\text{-Fe}^{\text{int}}$ , and  $\text{Fe}^{\text{top}}\text{-Fe}^{\text{bot}}$ , has mirror symmetries and a 2-fold axis, resulting in a zero DMI between them. The locally broken inversion symmetry of  $\text{Fe}^{\text{top}}\text{-Fe}^{\text{mid}}$  ( $\text{Fe}^{\text{bot}}\text{-Fe}^{\text{mid}}$ ) yields a local in-plane DMI perpendicular to itself that stabilizes Néel-type skyrmions (Table 2). Similarly,  $\text{Fe}^{\text{top}}\text{-Fe}^{\text{top}}$  ( $\text{Fe}^{\text{bot}}\text{-Fe}^{\text{bot}}$ ) exhibits a local in-plane DMI as a result of a mirror perpendicular to the  $\text{Fe}^{\text{top}}\text{-Fe}^{\text{top}}$  bond. Furthermore, the intercalated  $\text{Fe}^{\text{int}}$  may also introduce a new local DMI. Although these local DMIs cancel with each other, the net DMI vanishes. However, random local DMIs induced by disordered  $\text{Fe}^{\text{int}}$  can be considered to stabilize the various topological spin textures.

**Supplementary Table 2.** The DMI parameters (in meV) of  $\text{Fe}_3\text{GaTe}_2$  (FGT) and  $\text{Fe}_3\text{GaTe}_2$  with full intercalated  $\text{Fe}^{\text{int}}$  (FGTF) MLs under different exchange paths marked in Supplementary Fig. 22. The negative and positive values represent the opposite direction.

| Exchange paths | tm    | bm    | mm   | tt    | bb   | ii   |
|----------------|-------|-------|------|-------|------|------|
| FGT            | 2.48  | -2.48 | 0    | -2.03 | 2.03 |      |
| FGTF           | -0.63 | -1.23 | 0.26 | 0.66  | 2.21 | 0.71 |

## Supplementary References

- [1] C. T. Chen, *et al.* Experimental Confirmation of the X-Ray Magnetic Circular Dichroism Sum Rules for Iron and Cobalt *Phys. Rev. Lett.* **75**, 152 (1995).
- [2] Horcas, I. *et al.* WSXM: A software for scanning probe microscopy and a tool for nanotechnology. *Rev. Sci. Instrum.* **78**, (2007).
- [3] Wu, Y. *et al.* Fe-Intercalation Dominated Ferromagnetism of van der Waals Fe<sub>3</sub>GeTe<sub>2</sub>. *Adv. Mater.* **35**, 2302568, (2023)
- [4] S. Mühlbauer, *et al.* Skyrmion Lattice in a Chiral Magnet. *Science* **323**,915-919 (2009).
- [5] X. Yu, *et al.* Near room-temperature formation of a skyrmion crystal in thin films of the helimagnet FeGe. *Nature Mater.* **10**, 106–109 (2011).
